# Supplementary material for: Adherence to the Mediterranean Diet and Risk of Gastric Cancer: A Systematic Review and Meta-Analysis
Source: MDPI journal article supplement (doi:10.3390/nu15173826), 2023-09-01
Supplement: s1 [file s1]

# Supplementary Materials: Adherence to the Mediterranean Diet and Risk of Gastric Cancer: A Systematic Review and Meta-Analysis

Xiao Bai, Xue Li, Siqi Ding and Dongqiu Dai

**Table S1.** Search strategy

| Search                  | Query                                                                                                                                               | Items  |
|-------------------------|-----------------------------------------------------------------------------------------------------------------------------------------------------|--------|
| <b>PubMed</b>           |                                                                                                                                                     |        |
| #1                      | (Diet, Mediterranean[MeSH Terms]) OR (Diets, Mediterranean) OR (Mediterranean Diet) OR (Mediterranean Diet Score) OR (Dietary Pattern)              | 213007 |
| #2                      | (Stomach Neoplasms[MeSH Terms]) OR (Stomach Neoplasm*) OR (Gastric Neoplasm*) OR (Stomach Cancer*) OR (Gastric Cancer*) OR (Gastric Adenocarcinoma) | 177485 |
| #3                      | #1 AND #2                                                                                                                                           | 1139   |
| <b>Embase</b>           |                                                                                                                                                     |        |
| #1                      | 'mediterranean diet'/exp OR 'dietary pattern'/exp OR ' mediterranean diet score'                                                                    | 17492  |
| #2                      | 'stomach cancer'/exp OR 'stomach adenocarcinoma'/exp OR 'gastric cancer' OR 'gastric neoplasm'                                                      | 178206 |
| #3                      | #1 AND #2                                                                                                                                           | 98     |
| <b>Cochrane Library</b> |                                                                                                                                                     |        |
| #1                      | MeSH descriptor: [Diet, Mediterranean] explode all trees                                                                                            | 756    |
| #2                      | ("Mediterranean Diet") OR ("Mediterranean Diet Score") OR ("Dietary Pattern")                                                                       | 4629   |
| #3                      | #1 OR #2                                                                                                                                            | 4629   |
| #4                      | MeSH descriptor: [Stomach Neoplasms] explode all trees                                                                                              | 3449   |
| #5                      | ("Stomach Neoplasm*") OR ("Gastric Neoplasm*") OR ("Stomach Cancer*") OR ("Gastric Cancer*") OR ("Gastric Adenocarcinoma")                          | 11943  |
| #6                      | #4 OR #5                                                                                                                                            | 11943  |
| #7                      | #3 AND #6                                                                                                                                           | 37     |
| <b>Web of Science</b>   |                                                                                                                                                     |        |
| #1                      | TS=("Diet, Mediterranean" OR "Mediterranean Diet" OR "Mediterranean Diet Score" OR "Dietary Pattern")                                               | 99764  |
| #2                      | TS=("Stomach Neoplasms" OR "Stomach Neoplasm" OR "Gastric Neoplasm*" OR "Stomach Cancer*" OR "Gastric Cancer*" OR "Gastric Adenocarcinoma")         | 308307 |
| #3                      | #1 AND #2                                                                                                                                           | 713    |
